# Supplementary material for: Ultrafast photonics applications based on evanescent field interactions with 2D molybdenum carbide (Mo2C)
Source: Royal Society of Chemistry journal article supplement (doi:10.1039/d1tc00628b), 2021-01-01
Supplement: d1tc00628b1.pdf [file d1tc00628b1.pdf]

## Supporting information for manuscript “Ultrafast Photonics Applications Based on Evanescent Field Interactions with 2D Molybdenum Carbide (Mo<sub>2</sub>C)”

Shunxiang Liu, Jinsheng Lu, Hongfu Huang, Junle Qu, Qiao Wen\*

**Table 1.** Output performance comparison of mode-locked fibre lasers using various 2D material SAs at a wavelength of 1  $\mu\text{m}$ .

| SA type                                       | Pulse width (ps) | Output power (mW) | Pulse energy (nJ) | Slope efficiency (%) | Ref.     |
|-----------------------------------------------|------------------|-------------------|-------------------|----------------------|----------|
| Graphene                                      | 340              | 2.1               | 0.148             | NA                   | 1        |
| BP                                            | 400              | 32.5              | 0.7               | 7.2                  | 2        |
| Bi <sub>2</sub> Se <sub>3</sub>               | 960              | 1.2               | 1.08              | NA                   | 3        |
| Sb <sub>2</sub> Te <sub>3</sub>               | 5.9              | 4                 | 0.21              | NA                   | 4        |
| WS <sub>2</sub>                               | 2500             | 8.02              | 2.82              | 2.45                 | 5        |
| MoS <sub>2</sub>                              | 800              | 9.3               | 1.41              | NA                   | 6        |
| Ti <sub>3</sub> C <sub>2</sub> T <sub>x</sub> | 480              | 9                 | 0.47              | NA                   | 7        |
| Ti <sub>2</sub> CT <sub>x</sub>               | 792              | 11.93             | 0.72              | 3.11                 | 8        |
| Mo <sub>2</sub> C                             | 418              | NA                | NA                | NA                   | 9        |
| Mo <sub>2</sub> C                             | 350              | 7.7               | 0.38              | 3.7                  | Our work |

**Table 2.** Output performance comparison of erbium-doped mode-locked fibre lasers based on various 2D material SAs

| SA type                                       | Pulse width (fs) | Pulse energy (nJ) | Peak power (W) | Slope efficiency (%) | Ref.     |
|-----------------------------------------------|------------------|-------------------|----------------|----------------------|----------|
| Graphene                                      | 756              | 1.12              | 1478           | 3                    | 10       |
| BP                                            | 940              | 1.13              | 1201           | NA                   | 11       |
| Bi <sub>2</sub> Se <sub>3</sub>               | 600              | 0.053             | 88.2           | NA                   | 12       |
| Sb <sub>2</sub> Te <sub>3</sub>               | 1800             | 0.105             | 58.5           | NA                   | 13       |
| WS <sub>2</sub>                               | 21100            | 0.22              | 10.4           | 2.6                  | 14       |
| MoS <sub>2</sub>                              | 710              | 0.147             | 207            | NA                   | 15       |
| Ti <sub>3</sub> CNT <sub>x</sub>              | 660              | 0.003             | 4.9            | NA                   | 16       |
| Ti <sub>3</sub> C <sub>2</sub> T <sub>x</sub> | 159              | 0.41              | 2578.6         | NA                   | 7        |
| Ti <sub>2</sub> CT <sub>x</sub>               | 265              | 1.44              | 5434           | 2.02                 | 8        |
| Mo <sub>2</sub> C                             | 1710             | 0.48              | 264            | NA                   | 9        |
| Mo <sub>2</sub> C                             | 313              | 2.41              | 7715           | 10                   | 17       |
| Mo <sub>2</sub> C                             | 290              | 0.86              | 2982           | 4.1                  | Our work |

### References

- 1 S. S. Huang, Y. G. Wang, P. G. Yan, J. Q. Zhao, H. Q. Li and R. Y. Lin, *Opt. Express*, 2014, **22**, 11417-11426.
- 2 H. Song, Q. Wang, Y. Zhang and L. Li, *Optics Communications*, 2017, **394**, 157-160.
- 3 P. G. Yan, R. Y. Lin, H. Chen, H. Zhang, A. J. Liu, H. P. Yang and S. C. Ruan, *IEEE Photonics Technol. Lett.*, 2015, **27**, 264-267.
- 4 M. Kowalczyk, J. Boguslawski, R. Zybala, K. Mars, A. Mikula, G. Sobon and J. Sotor, *Optical Materials Express*, 2016, **6**, 2273-2282.
- 5 H. Guoyu, Y. Song, K. Li, Z. Dou, J. Tian and X. Zhang, *Laser Physics Letters*, 2015, **12**, 125102.

- 6 H. Zhang, S. B. Lu, J. Zheng, J. Du, S. C. Wen, D. Y. Tang and K. P. Loh, *Opt. Express*, 2014, **22**, 7249-7260.
- 7 X. Jiang, S. Liu, W. Liang, S. Luo and Z. Han, *Laser & Photonics Review*, 2018, **12**, 1700229.
- 8 Y. H. Shi, N. Xu and Q. Wen, *J. Lightwave Technol.*, 2020, **38**, 1975-1980.
- 9 M. Tuo, C. Xu, H. Mu, X. Bao, Y. Wang, S. Xiao, W. Ma, L. Li, D. Tang, H. Zhang, M. Premaratne, B. Sun, H.-M. Cheng, S. Li, W. Ren and Q. Bao, *Acs Photonics*, 2018, **5**, 1808-1816.
- 10 Q. L. Bao, H. Zhang, Y. Wang, Z. H. Ni, Y. L. Yan, Z. X. Shen, K. P. Loh and D. Y. Tang, *Adv. Funct. Mater.*, 2009, **19**, 3077-3083.
- 11 Z. C. Luo, M. Liu, Z. N. Guo, X. F. Jiang, A. P. Luo, C. J. Zhao, X. F. Yu, W. C. Xu and H. Zhang, *Opt. Express*, 2015, **23**, 20030.
- 12 Junsu, Lee, Joonhoi, Koo, Young, Min, Jhon, Ju and Han, *Optics express*, 2014, **22**, 6165-6173.
- 13 J. Sotor, G. Sobon, W. Macherzynski, P. Paletko, K. Grodecki and K. M. Abramski, *Optical Materials Express*, 2014, **4**, 1-6.
- 14 D. Mao, S. L. Zhang, Y. D. Wang, X. T. Gan, W. D. Zhang, T. Mei, Y. G. Wang, Y. S. Wang, H. B. Zeng and J. L. Zhao, *Opt. Express*, 2015, **23**, 27509-27519.
- 15 H. Liu, A. P. Luo, F. Z. Wang, R. Tang, M. Liu, Z. C. Luo, W. C. Xu, C. J. Zhao and H. Zhang, *Opt. Lett.*, 2014, **39**, 4591-4594.
- 16 Y. I. Jhon, J. Koo, B. Anasori, M. Seo, J. H. Lee, Y. Gogotsi and Y. M. Jhon, *Adv. Mater.*, 2017, **29**, 1702496.
- 17 S. Liu, Y. Wang, R. Lv, J. Wang, H. Wang, Y. Wang and L. Duan, *Nanophotonics*, 2020, **9**, 2523-2530.
